# Supplementary material for: Breathing space: deoxygenation of aquatic environments can drive differential ecological impacts across biological invasion stages
Source: Biol Invasions. 2021 Apr 30;23(9):2831–47. doi: 10.1007/s10530-021-02542-3 (PMC8550720; doi:10.1007/s10530-021-02542-3)
Supplement: Supplementary file 1 — Supplementary file1 (XLSX 19 kb) [file 10530_2021_2542_MOESM1_ESM.xlsx]

## Sheet: FR
rep	pred	oxy	suppl	run	eaten	alive
3	goby	90	4	1	4	0
1	con	30	64	1	0	64
3	bull	30	8	1	2	6
1	bull	90	2	1	0	2
2	goby	60	16	1	11	5
1	con	60	8	1	0	8
2	bull	60	4	1	0	4
3	goby	60	2	1	2	0
2	goby	30	4	1	4	0
1	bull	30	16	1	15	1
3	goby	90	2	1	2	0
2	bull	60	8	1	1	7
3	bull	90	16	1	15	1
3	goby	30	64	1	26	38
3	goby	30	2	2	2	0
2	goby	30	16	2	12	4
3	bull	30	16	2	11	5
1	goby	90	16	2	9	7
2	bull	90	4	2	0	4
2	goby	60	32	2	15	17
1	con	30	8	2	0	8
3	bull	90	64	2	35	29
1	bull	30	64	2	5	59
1	con	60	32	2	0	32
1	bull	60	4	2	4	0
3	goby	60	8	2	8	0
2	bull	60	16	2	16	0
3	goby	90	8	2	3	5
2	goby	30	2	3	2	0
2	goby	90	4	3	4	0
3	bull	60	8	3	5	3
1	bull	30	8	3	7	1
3	bull	30	4	3	0	4
1	goby	60	4	3	0	4
3	goby	60	16	3	16	0
1	bull	90	16	3	16	0
1	con	30	4	3	0	4
1	con	60	2	3	0	2
2	bull	60	64	3	36	28
2	bull	90	8	3	3	5
1	goby	90	4	3	4	0
2	goby	30	64	3	26	38
1	con	30	2	4	0	2
2	bull	60	2	4	0	2
1	goby	30	2	4	2	0
1	bull	60	64	4	36	28
2	goby	60	64	4	42	22
2	goby	60	4	4	4	0
2	bull	30	4	4	0	4
3	goby	90	64	4	30	34
2	goby	90	32	4	24	8
3	bull	90	4	4	1	3
1	goby	30	32	4	19	13
1	bull	30	32	4	9	23
1	con	90	4	4	0	4
1	bull	90	32	4	29	3
2	goby	90	8	5	8	0
3	goby	30	4	5	4	0
1	con	90	2	5	0	2
2	bull	90	2	5	2	0
2	bull	30	64	5	21	43
3	goby	60	4	5	4	0
3	bull	60	64	5	23	41
2	goby	60	8	5	8	0
1	con	30	32	5	0	32
2	bull	60	32	5	24	8
1	bull	30	2	5	0	2
2	goby	30	32	5	32	0
2	goby	90	2	5	2	0
3	bull	90	32	5	24	8
2	bull	30	32	6	15	17
1	bull	90	4	6	4	0
2	goby	30	8	6	8	0
2	bull	90	16	6	10	6
2	goby	90	16	6	16	0
3	goby	60	32	6	21	11
2	goby	90	64	6	18	46
2	bull	30	2	6	2	0
3	bull	60	2	6	2	0
3	bull	60	32	6	14	18
1	con	30	16	6	0	16
1	goby	30	16	6	16	0
1	con	90	32	6	0	32
1	goby	60	8	6	8	0
1	bull	90	64	7	11	53
1	bull	60	16	7	7	9
1	goby	30	64	7	43	21
2	bull	90	64	7	31	33
3	bull	30	32	7	1	31
2	goby	60	2	7	2	0
1	goby	90	8	7	5	3
3	goby	90	32	7	32	0
1	goby	60	16	7	16	0
1	bull	60	32	7	17	15
2	bull	30	16	7	16	0
1	con	60	64	7	0	64
3	goby	30	8	7	8	0
1	con	90	64	7	0	64
3	goby	30	16	8	15	1
1	goby	60	32	8	30	2
1	con	90	16	8	0	16
1	goby	90	64	8	40	24
1	bull	60	8	8	8	0
3	bull	30	2	8	2	0
1	con	60	16	8	1	15
3	goby	90	16	8	8	8
3	goby	60	64	8	23	41
2	bull	90	32	8	26	6
3	goby	30	32	8	29	3
3	bull	90	2	8	2	0
2	bull	30	8	8	1	7
1	bull	60	2	8	2	0
3	bull	60	16	9	15	1
1	con	60	4	9	0	4
1	goby	60	64	9	49	15
1	goby	90	2	9	2	0
1	bull	30	4	9	4	0
1	goby	60	2	9	2	0
1	goby	30	8	9	7	1
1	goby	30	4	9	4	0
3	bull	90	8	9	8	0
1	bull	90	8	9	8	0
1	goby	90	32	9	31	1
3	bull	60	4	9	4	0
1	con	90	8	9	0	8
3	bull	30	64	9	18	46

## Sheet: mesocosm
rep	treat(b_g)	oxy	eaten	alive	supply	run		Same reduction regime as FR experiment. Conducted outside (14 +- 2 degrees C) in 50 L arenas (80 x 63 cm). Fish starved 24 h prior and fed for 1 h during light (12:12~). Gammarid size class same as FRs.
1	0_0	90	2	198	200	3
1	0_2	90	58	142	200	1
2	0_2	90	75	125	200	5
3	0_2	90	82	118	200	1							(b_g)	Invasion stage		Eaten	Mean	SE
1	0_4	90	144	56	200	4						1	0_2	3	90	58
2	0_4	90	102	98	200	5						2	0_2	3	90	75
3	0_4	90	101	99	200	3						3	0_2	3	90	82	71.6667	7.12585
1	2_0	90	38	162	200	2						1	0_4	4	90	144
2	2_0	90	106	94	200	5						2	0_4	4	90	102
3	2_0	90	83	117	200	3						3	0_4	4	90	101	115.667	14.1696
1	2_2	90	137	63	200	3						1	2_0	1	90	38
2	2_2	90	143	57	200	4						2	2_0	1	90	106
3	2_2	90	125	75	200	4						3	2_0	1	90	83	75.6667	19.9694
1	0_0	60	0	200	200	4						1	2_2	2	90	137
1	0_2	60	56	144	200	1						2	2_2	2	90	143
2	0_2	60	163	37	200	2						3	2_2	2	90	125	135	5.2915
3	0_2	60	85	115	200	3
1	0_4	60	161	39	200	1
2	0_4	60	150	50	200	4
3	0_4	60	163	37	200	3
1	2_0	60	138	62	200	2						1	0_2	3	60	56
2	2_0	60	47	153	200	5						2	0_2	3	60	163
3	2_0	60	81	119	200	5						3	0_2	3	60	85	101.333	31.9496
1	2_2	60	167	33	200	5						1	0_4	4	60	161
2	2_2	60	125	75	200	3						2	0_4	4	60	150
3	2_2	60	178	22	200	2						3	0_4	4	60	163	158	4.04145
1	0_0	30	0	200	200	4						1	2_0	1	60	138
1	0_2	30	57	143	200	3						2	2_0	1	60	47
2	0_2	30	86	114	200	2						3	2_0	1	60	81	88.6667	26.5477
3	0_2	30	61	139	200	1						1	2_2	2	60	167
1	0_4	30	104	96	200	5						2	2_2	2	60	125
2	0_4	30	136	64	200	4						3	2_2	2	60	178	156.667	16.1486
3	0_4	30	51	149	200	5
1	2_0	30	53	147	200	2
2	2_0	30	80	120	200	2
3	2_0	30	49	151	200	1						1	0_2	3	30	57
1	2_2	30	134	66	200	2						2	0_2	3	30	86
2	2_2	30	97	103	200	4						3	0_2	3	30	61	68	9.07377
3	2_2	30	77	123	200	1						1	0_4	4	30	104
												2	0_4	4	30	136
												3	0_4	4	30	51	97	24.7857
												1	2_0	1	30	53
												2	2_0	1	30	80
												3	2_0	1	30	49	60.6667	9.73539
												1	2_2	2	30	134
												2	2_2	2	30	97
												3	2_2	2	30	77	102.667	16.6966

## Sheet: Line cross results
Rep	Oxygen	Crosses
1	90	13
1	90	17
1	30	23
1	30	55
1	60	78
2	60	13
2	30	36
2	90	46
2	30	50
2	60	65
3	30	24
3	30	30
3	90	34
3	60	39
3	60	67
3	90	97
4	30	25
4	90	29
4	60	51
4	60	53
4	90	104
5	90	45
5	30	47
5	60	52
5	60	64
5	90	91
5	30	97
